# Supplementary material for: ERp29 Attenuates Nicotine-Induced Endoplasmic Reticulum Stress and Inhibits Choroidal Neovascularization
Source: MDPI journal article supplement (doi:10.3390/ijms242115523), 2023-10-24
Supplement: s1 [file s1]

Supplementary Table S1

| Target                                 | Source | Vendor                                 |
|----------------------------------------|--------|----------------------------------------|
| <u>GRP78 (3177)</u>                    | Rabbit | Cell Signaling Technology, MA, USA     |
| <u>CHOP (L63F7)</u>                    | Rabbit | Cell Signaling Technology, MA, USA     |
| <u><math>\beta</math>-actin (13E5)</u> | Rabbit | Cell Signaling Technology, MA, USA     |
| ERp29(37555)                           | Rabbit | Signalway Antibody LLC, Greenbelt, USA |

Supplementary Table S2

|                |                                  |
|----------------|----------------------------------|
| ERP29 FORWARD  | 5'-ACCCACGATTCTGAGCCCTGAG-3'     |
| ERP29 REVERSE  | 5'-CCCAGACCAGCTAGAGACATCCC-3'    |
| CD11b FORWARD  | 5'-GTTGTGACTTATGACCTGGCTCTGG-3'  |
| CD11b REVERSE  | 5'-TGTCTGTCTGCGTGTGCTGTTC-3'     |
| CD14 FORWARD   | 5'-AGCCTAGACCTCAGCCACAACCTC-3'   |
| CD14 REVERSE   | 5'-CAGCCCAGCGAACGACAGATTG-3'     |
| CD163 FORWARD  | 5'-ATGCTTCCATCCAGTGCCTC-3'       |
| CD163 REVERSE  | 5'-CACAAACCAAGAGTGCCGTGA-3'      |
| CD206 FORWARD  | 5'-GTTACCTGGAGTGATGGTTCTC-3'     |
| CD206 REVERSE  | 5'-AGGACATGCCAGGGTCACCTTT-3'     |
| IL-10 FORWARD  | 5'-GCCGTGGAGCAGGTGAAGAATG-3'     |
| IL-10 REVERSE  | 5'-ATAGAGTCGCCACCCTGATGTCTC-3'   |
| CCL-17 FORWARD | 5'-CCCAACAACAAGAGAGTGAAGAATGC-3' |
| CCL-17 REVERSE | 5'-CAACGGTGGAGGTCCCAGGTAG-3'     |
| iNOS FORWARD   | 5'-CGGCAAACATGACTTCAGGC-3'       |
| iNOS REVERSE   | 5'-GCACATCAAAGCGGCCATAG-3'       |
| CD80 FORWARD   | 5'-ATAACAGTGTCCGCAGAAGCAAGG-3'   |
| CD80 REVERSE   | 5'-CGTAAAGGGCAAGGTGGGGTAATC-3'   |
| CCR7 FORWARD   | 5'-GCTGTGGTCGTGGTCTTCATAGTC-3'   |
| CCR7 REVERSE   | 5'-AGGCGATGTTGAGTTGCTTACTGAG-3'  |
